# Supplementary material for: Nodule Formation and Nitrogen Use Efficiency Are Important for Soybean to Adapt to Water and P Deficit Conditions
Source: MDPI journal article supplement (doi:10.3390/agriculture12091326), 2022-08-28
Supplement: s1 [file s1]

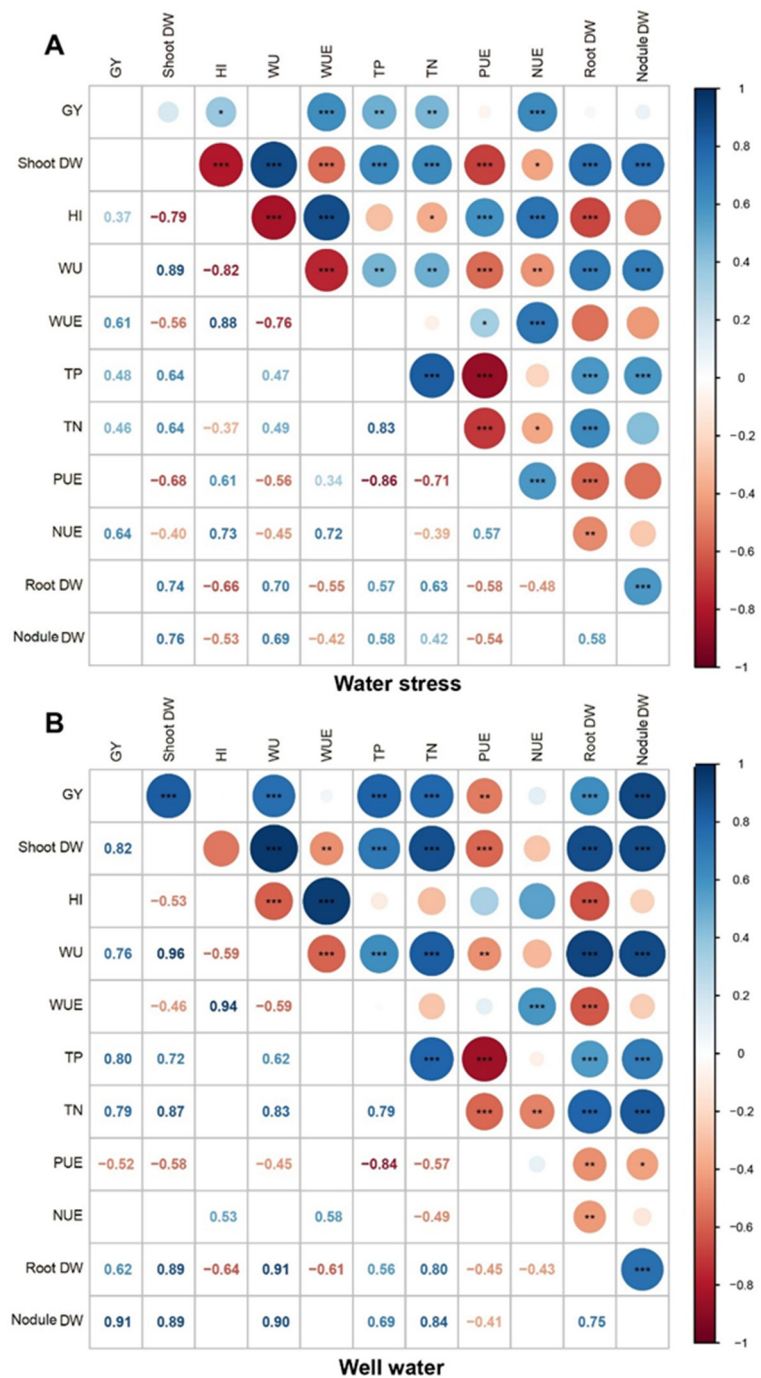

Figure S1. The root traits: root dry weight (A), nodule dry weight (B) of four genotypes under two water treatments and three P levels of four soybean genotypes [B (Bailudou), HD (Huangsedadou), J21 (Jindou 21) and ZH (Zhonghuang)] under two water treatments [S (cycle water stress), W (well-watered)] and three P levels [L, low P supply (P0), M, mid P supply (P60), H, high P supply (P120)]. The letters under each group of bars indicate different combinations of P and water treatments (as per Fig. 1). Values are means + one standard error of the mean (n = 3).
