# Supplementary material for: Nodule Formation and Nitrogen Use Efficiency Are Important for Soybean to Adapt to Water and P Deficit Conditions
Source: MDPI journal article supplement (doi:10.3390/agriculture12091326), 2022-08-28
Supplement: s1 [file s1]

Archive with 1 entries (1 files):
- agriculture-1853586-supplementary.pdf
